# Supplementary material for: Copy number variation modifies expression time courses
Source: HighWire-hosted journal article supplement (doi:10.1101/gr.112748.110), 2010-11-17
Supplement: Chaignat-2010-supplementary-GR-rerevised.pdf [file Chaignat-2010-supplementary-GR-rerevised.pdf]

**Supplementary Information online**

**Copy Number Variation modifies expression time-courses**  
**Evelyne Chaignat et al.**

## Supplementary Figures and Tables

### **Supplementary Figure S1: Gene expression variance between and within strains indicates that most of the variance is due to expression changes between strains**

Boxplots comparing the distributions of the standard deviations of expression signals within CNVs (CNV+), outside CNVs (CNV-), and of both groups combined (ALL) for brain and liver at four developmental time-points. The “between strains” standard deviations (white boxes) and the “within strain” standard deviations (gray boxes) were calculated using standard ANOVA (\*\*  $P < 0.001$ ).

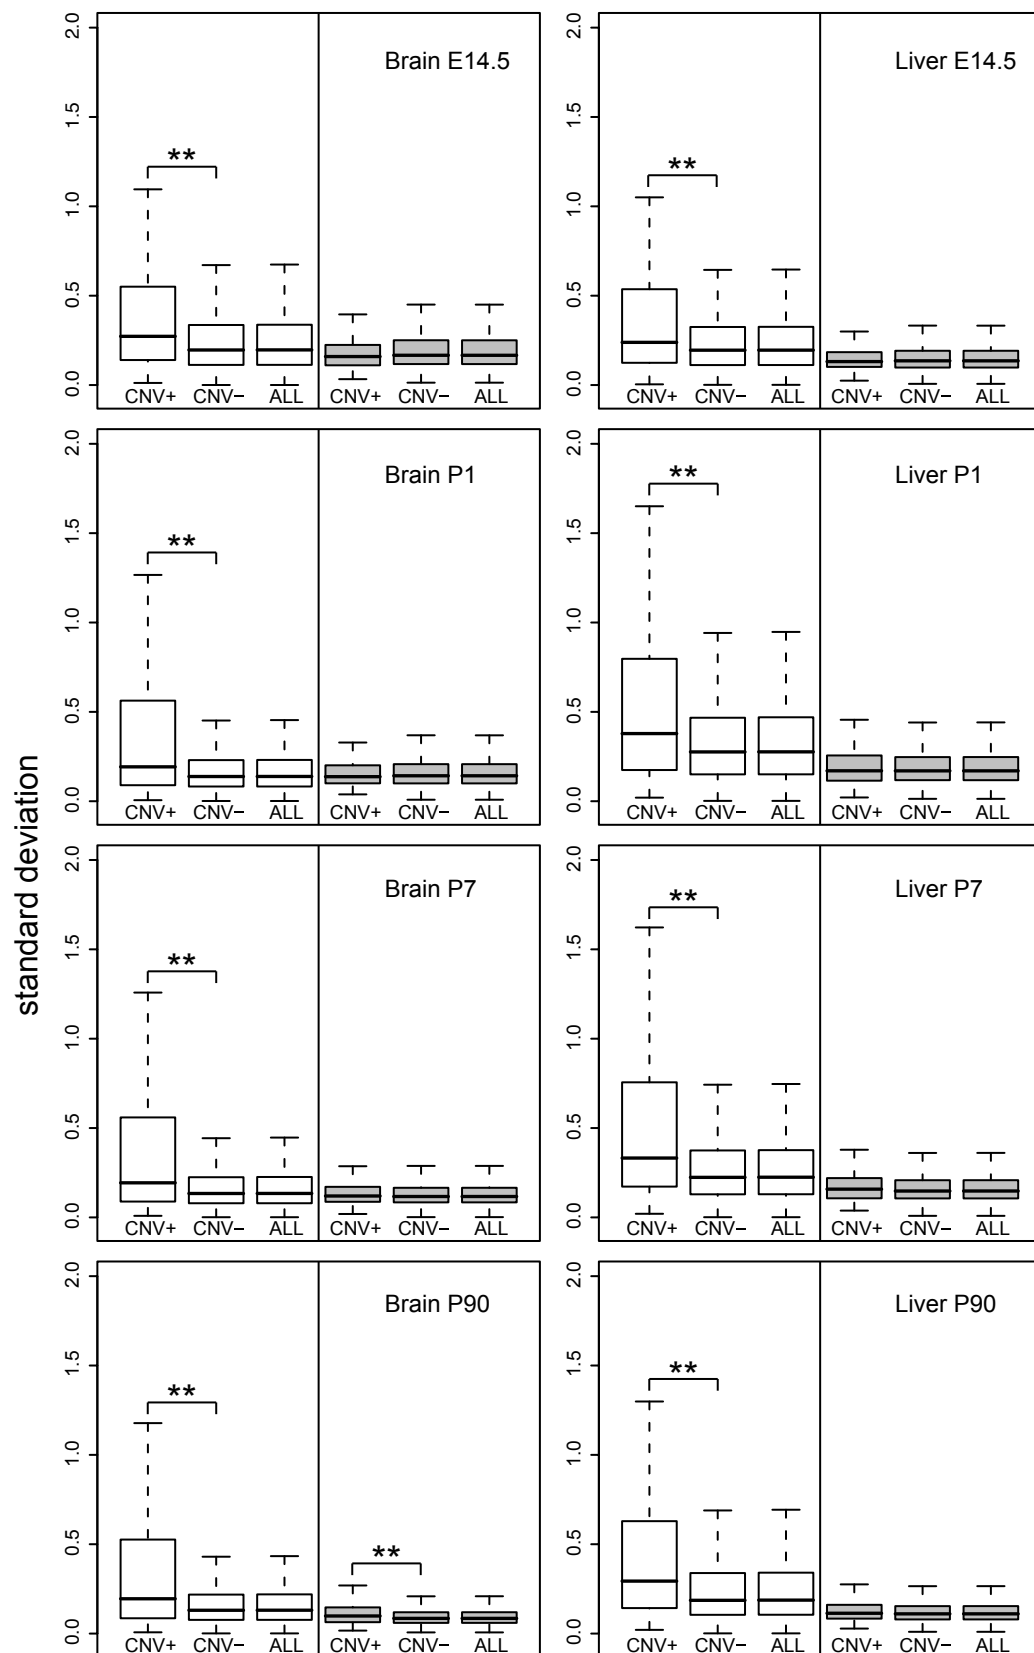

**Figure S1**

**Supplementary Figure S2: Variance of expression in different parts of the CNS of genes within CNVs, in neighboring regions, and elsewhere in the genome**

Boxplot distribution of signal variances for transcripts expressed in the bed nucleus of the stria terminalis (STR), the hippocampus (HIP), the hypothalamus (HYP), the periaqueductal gray (PER) and the pituitary gland (PIT), and mapping within CNVs (black), 50 - 250 kb of the nearest CNV breakpoint (gray), or further away (white) are shown. The data were computed using the GSE4734 mouse expression dataset (Hovatta et al., *Genome Biol*, 2007). The black (largest two-tailed  $P = 4 \times 10^{-4}$ , Mann-Whitney  $U$  test ( $U = 2396773$ )) and the gray distributions (largest two-tailed  $P = 0.094$ , Mann-Whitney  $U$  test; one exception is pituitary gland) are significantly different from the white in all monitored tissues. The numbers of transcripts for which expression could be detected are indicated.

**Figure S2**

**Variance of expression**

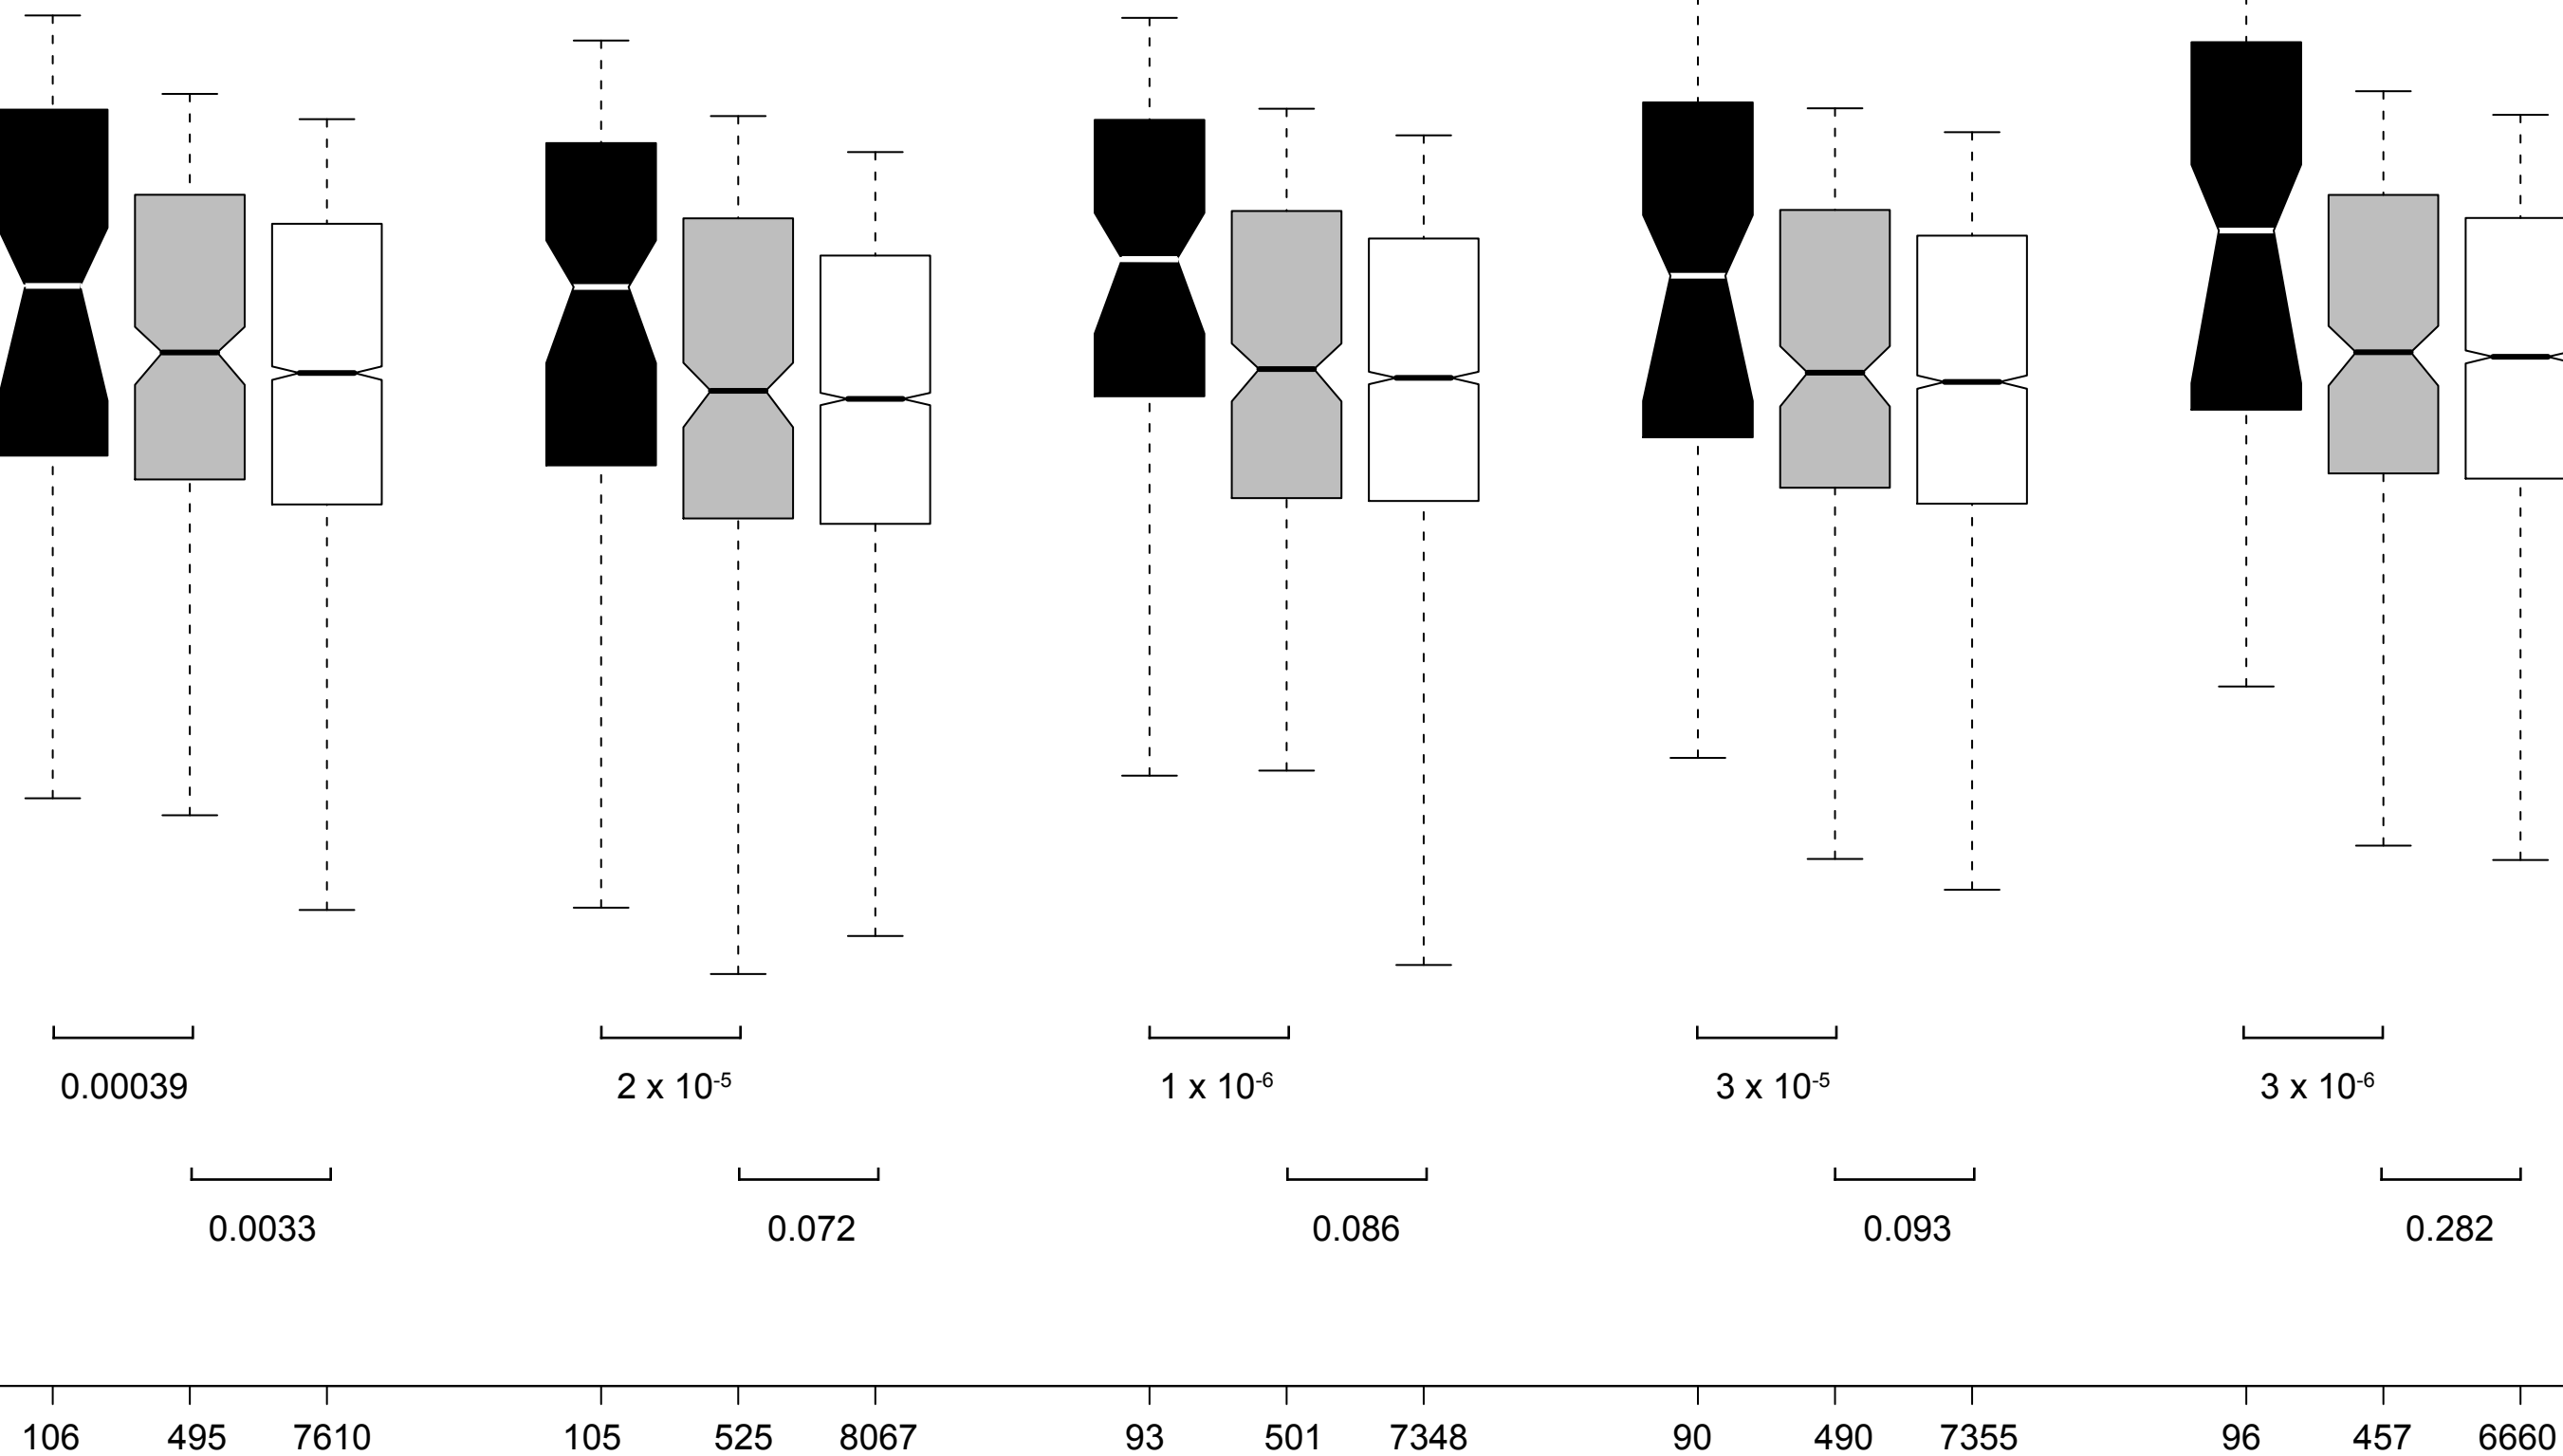

**STR**

**HIP**

**HYP**

**PER**

**PIT**

**Supplementary Figure S3: Clustering results produced by Mfuzz**

Graphs showing the three clusters of liver time-course expression profiles obtained with Mfuzz (Futschik & Carlisle, *J Bioinform Comput Biol*, 2005). Membership values are color-coded, with red and orange shades denoting high and low membership values, respectively (see inset on the bottom right). Time-courses were included in a given cluster only if their membership values were  $\geq 0.5$  (see Methods section for details).

# Figure S3

## Cluster 1

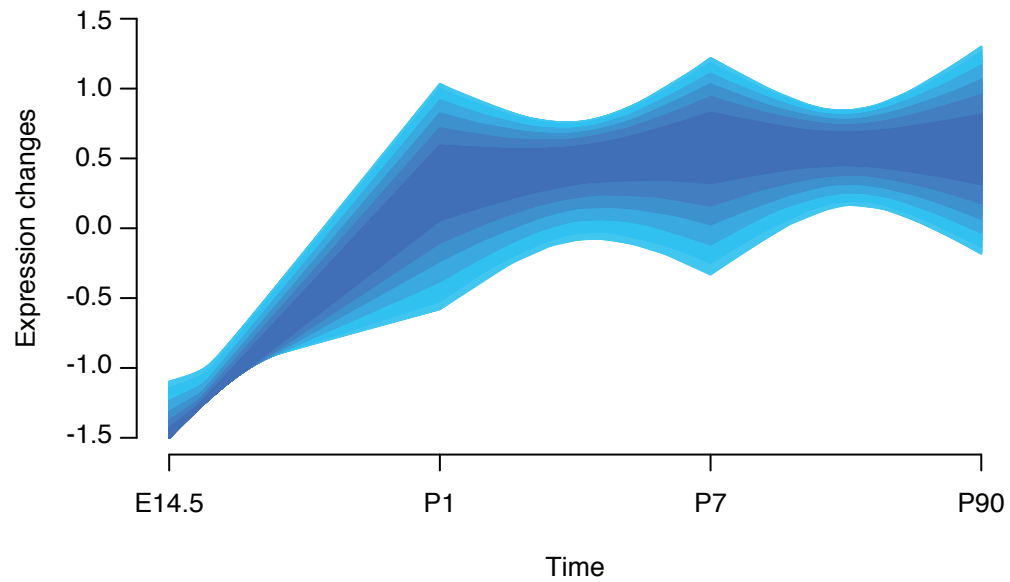

## Cluster 2

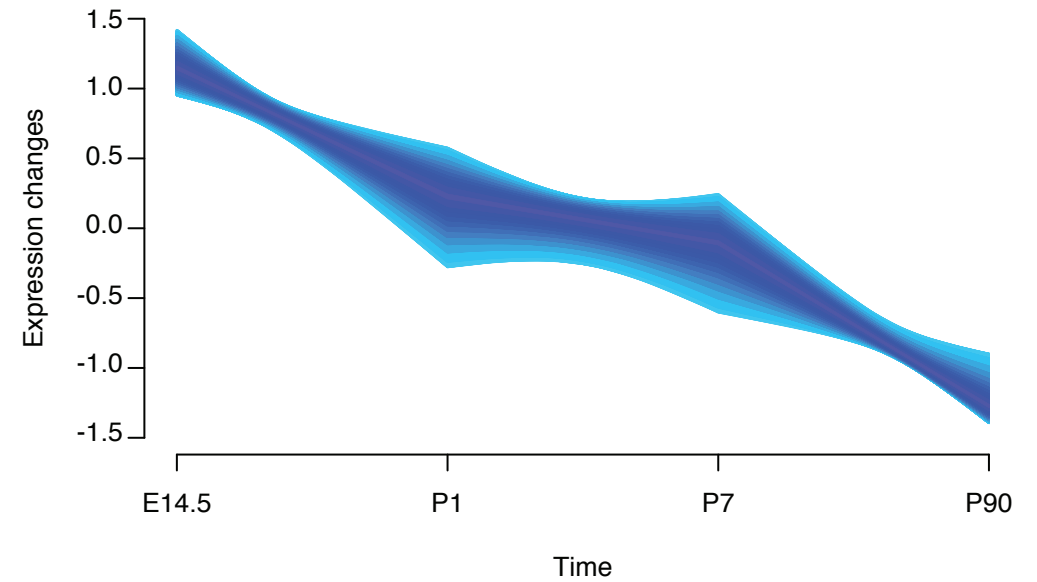

## Cluster 3

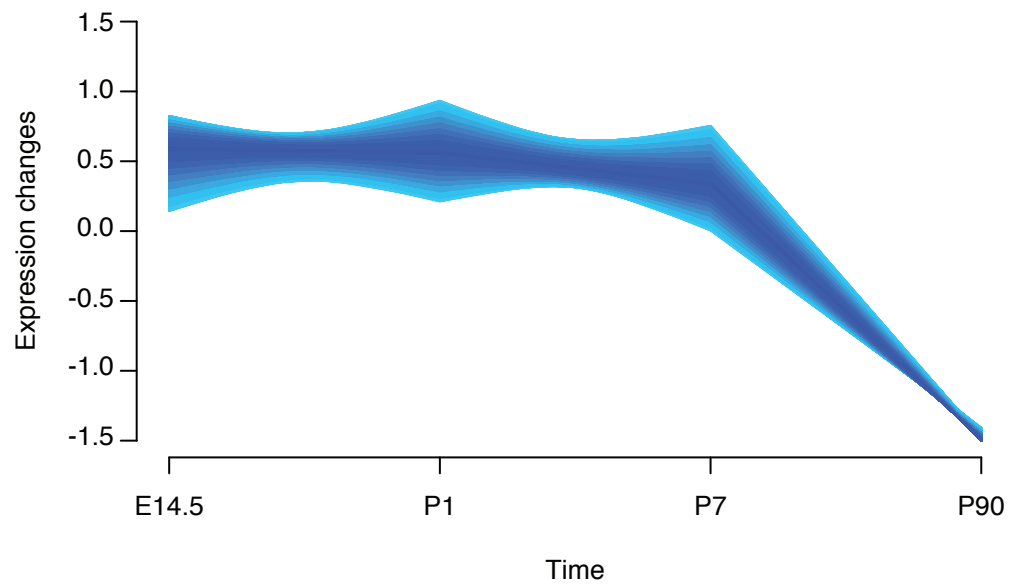

## Membership values

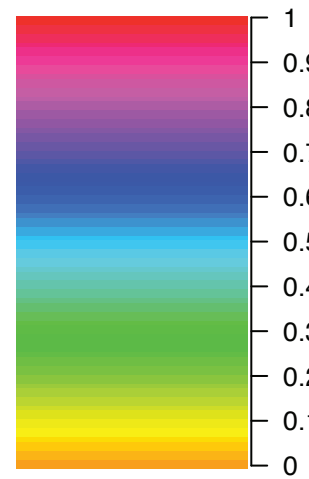

**Supplementary Figure S4:**

Assessed transcripts were ranked decreasingly by the sum of squares deviations from the mean between strains for each developmental time-points. CNV transcripts are represented by a disk and non-CNV transcripts by a circle, respectively. Data from brain are shown, while data from liver are presented in **Figure 4**. We observe in both brain and liver a statistically significant enrichment of CNV-transcripts amongst the transcripts with the highest score, i.e. the transcripts that vary more between strains (see text for details).



## Ranking of the sum of squared deviations from the mean

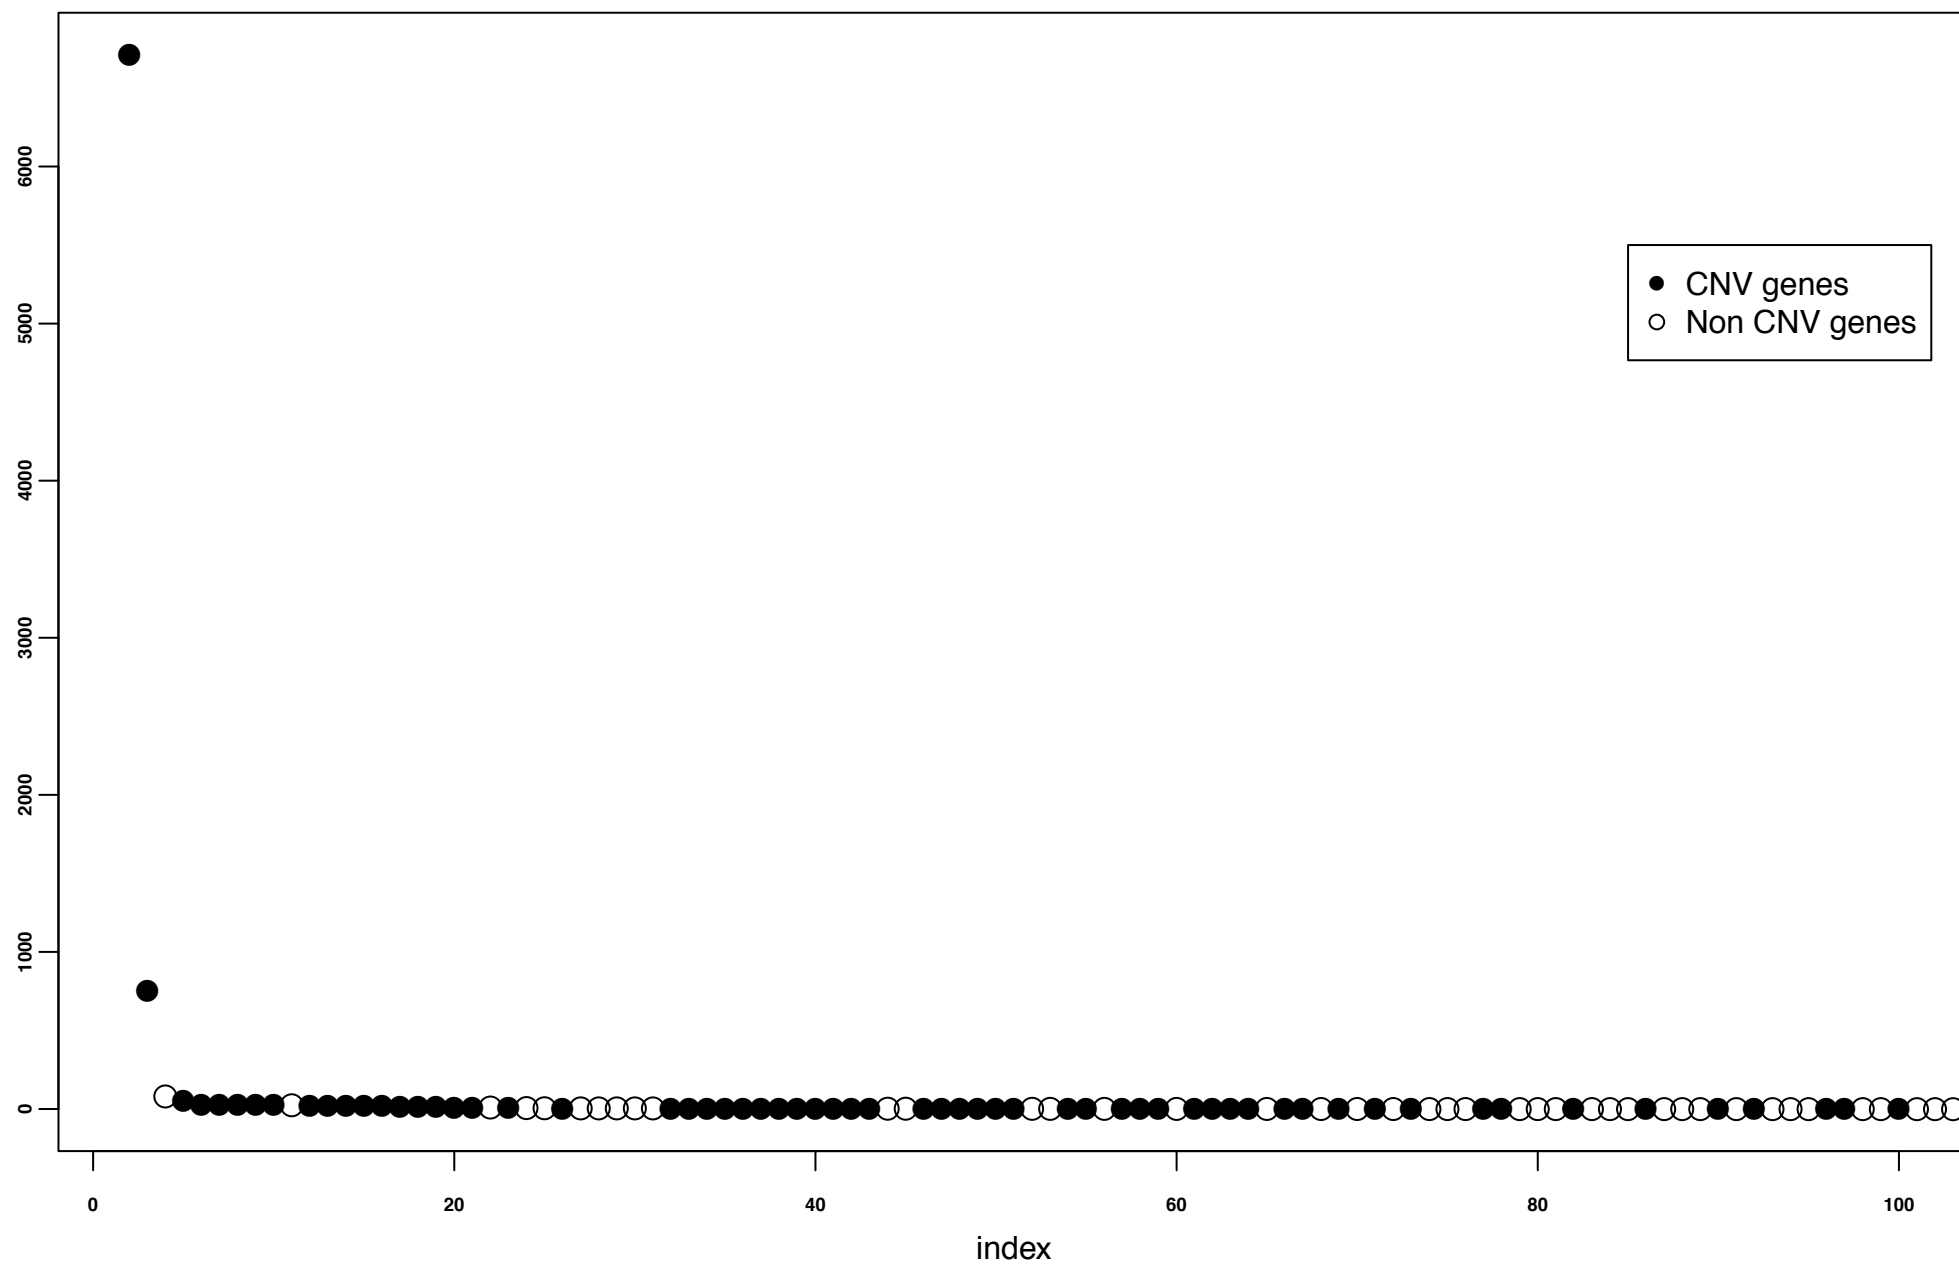

**Supplementary Table S1: Proportion of variance of expression due to copy number changes through development**

**Supplementary Table S2: Proportion of variance of expression due to copy number changes for different brain substructures**

**Supplementary Table S3: Genes and quantitative PCR assays**

| Supplementary Table S1: Proportion of variance of expression due to copy number changes through development |                 |         |         |        |        |        |         |        |         |
|-------------------------------------------------------------------------------------------------------------|-----------------|---------|---------|--------|--------|--------|---------|--------|---------|
| Measure                                                                                                     | Labels/Formulas | Brain   |         |        |        | Liver  |         |        |         |
|                                                                                                             |                 | E14.5   | P1      | P7     | P90    | E14.5  | P1      | P7     | P90     |
| sum sum sq between CNV-                                                                                     | B               | 9862.0  | 6493.6  | 6397.5 | 6601.5 | 7930.8 | 11820.1 | 9447.4 | 10837.9 |
| sum sum sq within CNV-                                                                                      | W               | 13596.9 | 10000.3 | 8805.1 | 2351.4 | 8142.4 | 9710.1  | 7505.2 | 3404.3  |
| sum sum sq between CNV+                                                                                     | b               | 310.2   | 278.0   | 292.1  | 394.3  | 394.2  | 550.1   | 643.4  | 624.2   |
| sum sum sq within CNV+                                                                                      | w               | 189.7   | 94.0    | 91.8   | 119.7  | 69.2   | 97.8    | 89.4   | 36.7    |
| proportion var strain effect                                                                                | $B/(B+W)=P$     | 0.42    | 0.39    | 0.42   | 0.74   | 0.49   | 0.55    | 0.56   | 0.76    |
| proportion var strain and CNV effect                                                                        | $b/(b+w)=p$     | 0.62    | 0.75    | 0.76   | 0.77   | 0.85   | 0.85    | 0.88   | 0.94    |
| expected sum sum sq between CNV+ without CNV effect                                                         | $w*P/(1-P)=q$   | 137.6   | 61.1    | 66.7   | 336.1  | 67.4   | 119.1   | 112.6  | 117.0   |
| calculated sum sum sq CNV effect                                                                            | $b-q=r$         | 172.6   | 216.9   | 225.4  | 58.2   | 326.7  | 431.1   | 530.9  | 507.2   |
| proportion var CNV effect                                                                                   | $r/(b+w)$       | 0.35    | 0.58    | 0.59   | 0.11   | 0.71   | 0.67    | 0.72   | 0.77    |

| Supplementary Table S2: Proportion of variance of expression due to copy number changes for different brain substructures |                 |                                 |             |              |                        |                 |
|---------------------------------------------------------------------------------------------------------------------------|-----------------|---------------------------------|-------------|--------------|------------------------|-----------------|
| Measure                                                                                                                   | Labels/Formulas | bed nucleus<br>stria terminalis | hippocampus | hypothalamus | periaqueductal<br>gray | pituitary gland |
| sum sum sq between CNV-                                                                                                   | B               | 1077297852                      | 834903243   | 799499082    | 709684856              | 1158445140      |
| sum sum sq within CNV-                                                                                                    | W               | 516340834                       | 265124929   | 444897630    | 204881887              | 299077978       |
| sum sum sq between CNV+                                                                                                   | b               | 43218033                        | 33791982    | 30209699     | 35393980               | 62856751        |
| sum sum sq within CNV+                                                                                                    | w               | 6966316                         | 4019601     | 10254441     | 4211387                | 7904670         |
| proportion var strain effect                                                                                              | $B/(B+W)=P$     | 0.68                            | 0.76        | 0.64         | 0.78                   | 0.79            |
| proportion var strain and CNV effect                                                                                      | $b/(b+w)=p$     | 0.86                            | 0.89        | 0.75         | 0.89                   | 0.89            |
| expected sum sum sq between CNV+ without CNV effect                                                                       | $w*P/(1-P)=q$   | 14534581                        | 12658099    | 18427646     | 14587708               | 30617858        |
| calculated sum sum sq CNV effect                                                                                          | $b-q=r$         | 28683452                        | 21133883    | 11782052     | 20806272               | 32238893        |
| proportion var CNV effect                                                                                                 | $r/(b+w)$       | 0.57                            | 0.56        | 0.29         | 0.53                   | 0.46            |

Supplementary Table S3: genes and quantitative PCR assays

| Gene ID            | Gene name            | Forward primer sequence   | Reverse primer sequence | CNV-gene      |
|--------------------|----------------------|---------------------------|-------------------------|---------------|
| ENSMUSG00000000326 | <i>Comt1</i>         | GAGATTAAACCTGACTACGC      | GATGAGATGGAAACCTTTGTC   | No            |
| ENSMUSG00000001100 | <i>Poldip2</i>       | CTCAGACAGAAAGCTGTGAC      | CTGACATAGTCCAAACCTCG    | No            |
| ENSMUSG00000001909 | <i>Trmt1</i>         | GTGATGGAGGACTTCTGTG       | ACTTGTGTAGCATGTCTC      | Yes           |
| ENSMUSG00000001910 | <i>Nncc1</i>         | TGTCAAGTACTACTGCCAG       | GTTCATCTTCCAAAGTGTGC    | Yes           |
| ENSMUSG00000001911 | <i>Nlfx</i>          | ACTTAAGTTTCCAGGACTGC      | CAAGCTGGAGTCTGTGACTC    | Yes           |
| ENSMUSG00000002395 | <i>Use1</i>          | GACAATCAGAACCTTCTCAG      | AGTTCACCTGACTCTGTGCG    | Yes           |
| ENSMUSG00000002617 | <i>Zfp40</i>         | ACTGTAGCAAGGATCCAG        | ATGTCTAGTAACTCTGTGG     | Yes           |
| ENSMUSG00000003058 | <i>Skf11</i>         | CGTCAAGAAGAGATCCAG        | CATGCCATATACATCTTCTGC   | Yes           |
| ENSMUSG00000003072 | <i>Alp5d</i>         | TAAGTACTTCTGTGACCGC       | ATACCGCATCTGCATCTCAG    | Yes           |
| ENSMUSG00000004677 | <i>Myo9b</i>         | TAGACAGTAGGGTTAGCCC       | GATCTTGGATCTGGGTG       | Yes           |
| ENSMUSG00000004934 | <i>Pias4</i>         | TATGGCAAGAGCTACTCTG       | CAATCGTCTTCAACCTCTG     | Yes           |
| ENSMUSG00000005204 | <i>Scnp3</i>         | AGGAGTCTCTACACCTCTG       | TGAAGATGTCACCATAGC      | Yes           |
| ENSMUSG00000007670 | <i>Khsrp</i>         | CAAGAAGCAAGCACAAGTG       | GTCTGTCCGTAGTAAGCAG     | No            |
| ENSMUSG00000010047 | <i>Hyal2</i>         | CAACTTTTGTGACTTTCCGTG     | AGAGATAAGCTCCACCTGG     | Yes           |
| ENSMUSG00000013833 | <i>Mod16</i>         | ATAACCATGGGAAGCTCAG       | TCACCATGCAGTATTCCAG     | Yes           |
| ENSMUSG00000013858 | <i>QHT-61</i>        | IACCACIACCGCTTAAAG        | GIAGATCAIGGAAGCTGGGA    | Yes           |
| ENSMUSG00000014418 | <i>Hps5</i>          | TGAATCCAAAGGATGCTGAC      | TCCTTCTCCTCAGTGTCTC     | No            |
| ENSMUSG00000015766 | <i>Eps8</i>          | CTTCTCAACTGAATGTTTACG     | CTTTTGCATTTGTTCTTGAG    | Yes           |
| ENSMUSG00000017548 | <i>Suz12</i>         | TATTCCTTTTTCAGGCGCA       | TGATGTCTCTGCTGCTC       | No            |
| ENSMUSG00000018761 | <i>Mpdu1</i>         | TCTGTTTCAGGAAGCTGGAG      | TGCAGTAGAAGAGGACCTG     | Yes           |
| ENSMUSG00000019774 | <i>Cd68</i>          | CAAGCATAGTCTTCTTCCAG      | GGTTGCAAGAGAAACATGC     | Yes           |
| ENSMUSG00000019975 | <i>Ikhip</i>         | ATTTCCAGCAAGTACCAGC       | CAGGACCTTTTACATGACCG    | No            |
| ENSMUSG00000020672 | <i>Snig2</i>         | GGTAAGACAAGAACGTAATC      | CTTTACTCGAGTCTTCCCA     | Yes           |
| ENSMUSG00000021018 | <i>Polr2h</i>        | GGACCTAAGGTGACAACTTCC     | CGAATCTGTACACCTTCC      | No            |
| ENSMUSG00000021477 | <i>Ctst</i>          | ATGATCCAGCTACACAACG       | TCTCATTTGGTCTGTCAC      | Yes           |
| ENSMUSG00000021576 | <i>Pdcd6</i>         | AAATTGACAGGCAAGGAC        | TATGCTGTCAACCTCTGC      | No            |
| ENSMUSG00000021771 | <i>Vdac2</i>         | TTCAGTAAACCTGCGTTGG       | GTGTGTGACCTTTCGACAG     | No            |
| ENSMUSG00000022307 | <i>Oxr1</i>          | GAGTGGGAGATTACTACAGG      | TGGTCCGGAAAGATTACAG     | Yes           |
| ENSMUSG00000022856 | <i>Tmem41a</i>       | CTGGTCTTGTAAACCTCTCG      | AAGGGATCAAAACCGATGAG    | No            |
| ENSMUSG00000023802 | <i>Zfp51</i>         | ACAGTCTATTGTACTGAAACAG    | TGAATGTCAACAGACCTGC     | No            |
| ENSMUSG00000024187 | <i>Ilf3</i>          | TTCATCATCCCATGTCCAG       | GAAGTCGTACATGACTGCA     | No            |
| ENSMUSG00000024350 | <i>Dnajc18</i>       | GGGTACAAAGAAATCAAGAAAGTG  | CTTAAAGCTTTCATCGCTG     | No            |
| ENSMUSG00000024645 | <i>1700034H14Rik</i> | GAAGTGGAAAGAACCCAG        | TAACTTTGTTCCGAAACGCT    | No            |
| ENSMUSG00000025381 | <i>Cnpy2</i>         | GAGCTTATCGAATCTTCTCC      | ATGGTCACATAGATCTGTCC    | No            |
| ENSMUSG00000025403 | <i>Shmt2</i>         | GAGAAGGACAGACAGTCTC       | CCGTAGTATCTCTGCCAGC     | Yes           |
| ENSMUSG00000025757 | <i>Hspu4l</i>        | GTGTTTATCGACATGGGAC       | GTAATGACCAACACTTTGAG    | No            |
| ENSMUSG00000025958 | <i>Creb1</i>         | CAGAAGAGGAGACTTCAGC       | GTAATGGCAATGACTCTGC     | No            |
| ENSMUSG00000026192 | <i>Atic</i>          | ACTGTGTTCTTCAGATGGAC      | TCTGGCTTAAACGAAGACC     | No            |
| ENSMUSG00000026535 | <i>Ifi202b</i>       | TCACAGTTTTCATCAAGGGAG     | TTGTTGCTTTCATGCCAC      | Yes           |
| ENSMUSG00000027472 | <i>Pdrg1</i>         | GGACACCAAGAGGAATCAG       | CAAACCATCACATCTTCAGAG   | No            |
| ENSMUSG00000027679 | <i>Dnajc19</i>       | TTAGGTGTAAGCCCTACTG       | GTTCAGACCTTCTTCCAC      | Yes           |
| ENSMUSG00000027716 | <i>Trpc3</i>         | CCAAGAGATCGAGGATGAC       | TTTCCATCATCGAAGTAGGAG   | Yes           |
| ENSMUSG00000028312 | <i>Smc2</i>          | TAAATCTACAGCCACAGCTC      | TTAGCAGTTACGCTGTGTC     | No            |
| ENSMUSG00000028393 | <i>Alad</i>          | CTTTGTACGCGATGTTCTCT      | TCTTCTAGCTGGTTTACGC     | Yes           |
| ENSMUSG00000028399 | <i>Ptprd</i>         | TGAGGCCATTATTAAGTGTG      | TAGGAATCTGATCTCCACG     | Yes           |
| ENSMUSG00000029014 | <i>Dnajc2</i>        | CATTATGCGGTTCTTGGAC       | GACCATGCTTTATGAGCTG     | No            |
| ENSMUSG00000029144 | <i>Mpv17</i>         | AACCTATCTCTGGGCTG         | TCCAGACAAATAGCAACAC     | No            |
| ENSMUSG00000030167 | <i>Klrc1</i>         | CTTTCAGTATCTCATGGAC       | GAGAATCTCTGCTATCTTTGG   | Yes           |
| ENSMUSG00000030401 | <i>Rtn2</i>          | TCTTGTCTCCTAGGAGTG        | CACATACCTGGTCAATCTGC    | Yes           |
| ENSMUSG00000030697 | <i>Ppp4c</i>         | TTCAITGGGAGACTTTGTGG      | AGGAATGCGAACCCTTAAGAG   | No            |
| ENSMUSG00000031508 | <i>Ankrd10</i>       | CTAGAACCAGAGTGGCAG        | TATTCAACACGGAGGACTCTG   | No            |
| ENSMUSG00000031584 | <i>Gsr</i>           | GAATAAAGTGGGCATTGACAG     | TAGACGCCCTTTGACATTGG    | Yes           |
| ENSMUSG00000031851 | <i>2310079N02Rik</i> | TAGGATCCGATGCTGCTCAG      | CTTCTGTAGGTTTCTTAGGAC   | Yes           |
| ENSMUSG00000031939 | <i>Taf1d</i>         | CTTTCTCCTATTGAAGAGCCA     | AAGCAACTGTCTTCAACCA     | No            |
| ENSMUSG00000033938 | <i>Ndufb7</i>        | ACAAGAGATGATGGATGCC       | CGTTTCAACGTAATCCAGG     | Yes           |
| ENSMUSG00000034041 | <i>Lyf1</i>          | AGTGATAAACCTGGGACAC       | AATGTAGACACTGTTGAGGA    | Yes           |
| ENSMUSG00000034101 | <i>Cttnid1</i>       | CTTTGGAGGAAGAGTTGGAG      | GCTAAATCTTCTGCATGGG     | No            |
| ENSMUSG00000034377 | <i>Tulp4</i>         | GACTTACCGATTCACAGGAGC     | TGTGGATTGGTGCAATAGG     | Yes           |
| ENSMUSG00000034748 | <i>Sirt6</i>         | TAAGTGTAGACGCGATGAG       | CAGTCCAGATGGGTGTCTC     | Yes           |
| ENSMUSG00000034771 | <i>Ile2</i>          | CATTATGTGATGGCTGCAC       | TACTGCAAGGAGAGACGTC     | Yes           |
| ENSMUSG00000034994 | <i>Eef2</i>          | AGAACATATTATCTCGGGG       | CGTCCATTTCTGTATGGG      | Yes           |
| ENSMUSG00000035032 | <i>Nek11</i>         | GTCTGACATCTGCTCACTG       | ACAGACAGAAAGCTGGAGC     | Yes           |
| ENSMUSG00000035151 | <i>Elmod2</i>        | TCCAAGAAATAGGCTCTACAG     | TTCTTCAIAGATGTTGCGT     | Yes           |
| ENSMUSG00000035443 | <i>Thyml</i>         | GGTATAGACATGAAGTTACGCA    | CTGATAGTTGGGAACAGCA     | No            |
| ENSMUSG00000035640 | <i>Dps</i>           | GCATTTCTTATGATGACAGG      | TTCTTGAAGCTTGAAGTAGG    | Yes           |
| ENSMUSG00000035754 | <i>Wdr19</i>         | ACATATCTGTGAGGCGAC        | ATGTCAGTGGTGTCTCTG      | Yes           |
| ENSMUSG00000035835 | <i>BC005764</i>      | TGCAACCTTACATCACAG        | TTGAGTACATGACACAGT      | Yes           |
| ENSMUSG00000035863 | <i>Palm</i>          | ATGATGAAGAGCATGGTCTC      | TGTGAATGAGTTCTGCTCAG    | Yes           |
| ENSMUSG00000036010 | <i>Tmtc9</i>         | GACATGCTCTATAATCTAGGCT    | CAATGGCCAGTTTGTAAATAGT  | Yes           |
| ENSMUSG00000036322 | <i>H2-Ea-ps</i>      | CCACTTTCTGACCTTCTCTG      | TTCCTTTCAAACTCCAGTG     | Yes           |
| ENSMUSG00000037257 | <i>Aagab</i>         | AAATGAAGACAAAGCTGCG       | CCATTGCCATCCAGAAAGG     | No            |
| ENSMUSG00000038406 | <i>Scaf1</i>         | GGACACTGACAAAGTACCTG      | TGTTAGTATGGCTTGTATGG    | No            |
| ENSMUSG00000038781 | <i>Stap2</i>         | GAGAAGGTTCTAGGCTTCTG      | CTTCCAGGACATAGCAGGG     | Yes           |
| ENSMUSG00000038871 | <i>Bpgm</i>          | CATCTGCAAGGATCTCAGAC      | CGTTCTCATGCAACTCCAG     | No            |
| ENSMUSG00000039114 | <i>Nm1</i>           | GATGCACTCTTAAAGGGCT       | AAATCCTCCAGTATGTGC      | No            |
| ENSMUSG00000039154 | <i>Shd</i>           | GAAACCCAGAAAGTGGAGGG      | GGACCATCAAATGCACTG      | Yes           |
| ENSMUSG00000039230 | <i>Tbcd</i>          | GAACTGTCTACTCAAACTG       | ACCACCAAGTAAGACTCTG     | No            |
| ENSMUSG00000039620 | <i>6430573F11Rik</i> | GTCATGGTATGTGACAACC       | ATGATGTATGACTCCTATGGAG  | Yes           |
| ENSMUSG00000040249 | <i>Lrp1</i>          | GTGTGACACACGCAATGAC       | CACCTTGAACCTGGTACTGG    | Yes           |
| ENSMUSG00000040809 | <i>Ch3l3</i>         | GATCATGCTTTTGTCTGGA       | CTCAGTGTCTTGTCTTTCAG    | Yes           |
| ENSMUSG00000041763 | <i>Ipp2</i>          | CAGCCATCTTTGTACTTCC       | GAICACATCAGCTTTCTTCC    | No            |
| ENSMUSG00000042642 | <i>Flnd1</i>         | GTACATCTGTAGCATCTCG       | AACACCTGGAGATTATACCTC   | Yes           |
| ENSMUSG00000042729 | <i>Wdr74</i>         | TTGGGACCAAGATACACAG       | GATCATAGACAGGACCTG      | No            |
| ENSMUSG00000044136 | <i>Sirpb1a</i>       | TGTTATGCTTGTCTAAACCA      | TAAAGGTCACTGTCTGCTG     | Yes           |
| ENSMUSG00000044308 | <i>Ubr3</i>          | CAGATCAAGAGTATAGGTTGC     | GACATTGTATCTGATTCTGAC   | No            |
| ENSMUSG00000044619 | <i>Pati1</i>         | TCTGAATCCAGCATCTGCG       | ACTGTAGGCAATCTCTGAG     | No            |
| ENSMUSG00000049313 | <i>Sor1</i>          | GGGAAATACCAATCATTGTC      | TGCTGATAACCAAACTGTG     | Yes           |
| ENSMUSG00000052459 | <i>Alp6v1a</i>       | AGTCAATGTGTCTGCTCTC       | GTGATATGACTACCAACCCG    | No            |
| ENSMUSG00000056144 | <i>Inm34</i>         | CCACTTGGGACAACTTCCAC      | ATGTCACCTTGTCTGTGTC     | Yes           |
| ENSMUSG00000056899 | <i>Immp2l</i>        | TTGTGTCAATGGTGTCTCTC      | ACTGTGTGATGATGATGC      | No            |
| ENSMUSG00000056940 | <i>Gm3696</i>        | AAGAGAATGGCGATGAAGG       | GTATTTCTAGGAGACCTGTGC   | Yes           |
| ENSMUSG00000057586 | <i>Trim30d</i>       | TATGTTCCAGCATCAGTTGGA     | CATGGTCTGAATGCTTGTG     | Yes           |
| ENSMUSG00000057729 | <i>Ptrin3</i>        | CATATGCTTCCGAGACTCG       | GAATTCAGGGAACCTGGAGG    | Yes           |
| ENSMUSG00000060212 | <i>Pcnx12</i>        | AGCTAIAAIAACAAGGCGCA      | AGGTTGTGTCTCATCTCTC     | Yes           |
| ENSMUSG00000060459 | <i>Kng2</i>          | TAGAGGTAATGCTTTCCTGG      | AAATCATCTCTGGATGAAGG    | No            |
| ENSMUSG00000062270 | <i>Mu14f1</i>        | GTGAGGATATTGTAGCCCT       | TTCATCCCAACTAGAGGTC     | Yes           |
| ENSMUSG00000062604 | <i>Srpk2</i>         | CAGTGACCCAAACAAAGAC       | CATGACAGCATGTATCCCA     | Yes           |
| ENSMUSG00000066687 | <i>Gm16432</i>       | CCATATGGGTGTATGATCCAG     | CCTATGATGACAGTGAAGG     | Yes           |
| ENSMUSG00000068114 | <i>Ccdc134</i>       | AGCTGAAGGATGCTTCTCT       | AGTGGTGGACAATCTTGG      | No            |
| ENSMUSG00000069206 | <i>Zfp874</i>        | ATTCTCCAGCAACAAACAG       | CTGGCATTCGACTTACAG      | Yes           |
| ENSMUSG00000070348 | <i>Curd1</i>         | GAGACCATCTCCCTTGACTG      | GAAGCAGTTCCATTTGCAG     | No            |
| ENSMUSG00000072735 | <i>Gm10406</i>       | TCCACAGCATTAAGGAGGAG      | GACACCTAAGCCAGGCTTG     | Yes           |
| ENSMUSG00000079580 | <i>Actb</i>          | CTAAGGCCAACCTGTAAGAT      | CACAGCCCTGGATGGCTACGT   | Normalization |
| ENSMUSG00000077472 | <i>Eef1a1</i>        | CCTGGCAAGCCCATGTGT        | TCATGTCAACGACGCAAGG     | Normalization |
| ENSMUSG00000075630 | <i>Hprt</i>          | GCTCGAGATGTCTGAAGGAGAT    | AAAGAACTATAGCCCGCTTGA   | Normalization |
| ENSMUSG00000070740 | <i>Rpl13</i>         | CTCATCTGTTCCCGAGAA        | GGGTGGCCAGCTTAAGTTCTT   | Normalization |
| ENSMUSG00000014767 | <i>Tbp</i>           | TTGACCTTAAAGACCATTGCACTTC | TTCTCATGATGACTGCAGCAAA  | Normalization |
